# Supplementary material for: Constraining the budget of NOx and VOCs at a remote Tropical island using multi-platform observations and WRF-Chem model simulations
Source: Copernicus journal article supplement (doi:10.5194/egusphere-2024-3555), 2025-01-15
Supplement: Supplementary file 1 [file egusphere-2024-3555-supplement.pdf]

**Table S1:** FTIR retrieval settings and estimated random and systematic uncertainties (in %) for the tropospheric columns of the species discussed in this work.

|                               | Spectral windows (cm <sup>-1</sup> )                                    | Spectroscopic parameters                                                                                                                               | Reference                                                                                                                                       | Random Uncertainty | Systematic Uncertainty |
|-------------------------------|-------------------------------------------------------------------------|--------------------------------------------------------------------------------------------------------------------------------------------------------|-------------------------------------------------------------------------------------------------------------------------------------------------|--------------------|------------------------|
| HCHO                          | 2763.42–2764.17<br>2765.65–2766.01<br>2778.15–2779.10<br>2780.65–2782.0 | Atm16<br>(= HITRAN 2012<br>for HCHO)                                                                                                                   | Vigouroux et al. (2018)                                                                                                                         | 7%                 | 13%                    |
| CH <sub>3</sub> OH            | 1029.0–1037.0                                                           | HITRAN2012,<br>except atm16 for<br>H <sub>2</sub> O lines                                                                                              | Vigouroux et al. (2012)                                                                                                                         | 2%                 | 17%                    |
| C <sub>2</sub> H <sub>6</sub> | 2976.66–2977.059<br>2983.2–2983.6                                       | C <sub>2</sub> H <sub>6</sub> PLL <sup>a</sup><br>CH <sub>3</sub> Cl:<br>HITRAN2012<br>Other species:<br>HITRAN 2008<br>(modified for O <sub>3</sub> ) | Franco et al. (2015)                                                                                                                            | 6%                 | 6%                     |
| CO                            | 2057.7–2058.0<br>2069.56–2069.76<br>2157.5–2159.15                      | Atm16 (=HITRAN<br>2008 for CO)                                                                                                                         | From<br><a href="https://www2.acom.ucar.edu/irwg">https://www2.acom.ucar.edu/irwg</a> ,<br>so slightly<br>adapted from<br>Senten et al. (2008). | 1.3%               | 3%                     |
| O <sub>3</sub>                | 991.25–993.8<br>1001.47–1003.04<br>1005.0–1006.9<br>1007.348–1009.0     | HITRAN 2020<br>Except atm20 for<br>H <sub>2</sub> O lines                                                                                              | Vigouroux et al. (2015)                                                                                                                         | 10%                | 3%                     |
| PAN                           | 1141.8–1184.0                                                           | PAN, HFC-23 and<br>CFC-12:<br>pseudo-linelist <sup>a</sup><br>HITRAN 2012 for<br>other species                                                         | This work                                                                                                                                       | 6%                 | 20%                    |

<sup>a</sup><http://mark4sun.jpl.nasa.gov/pseudo.html>

(a)

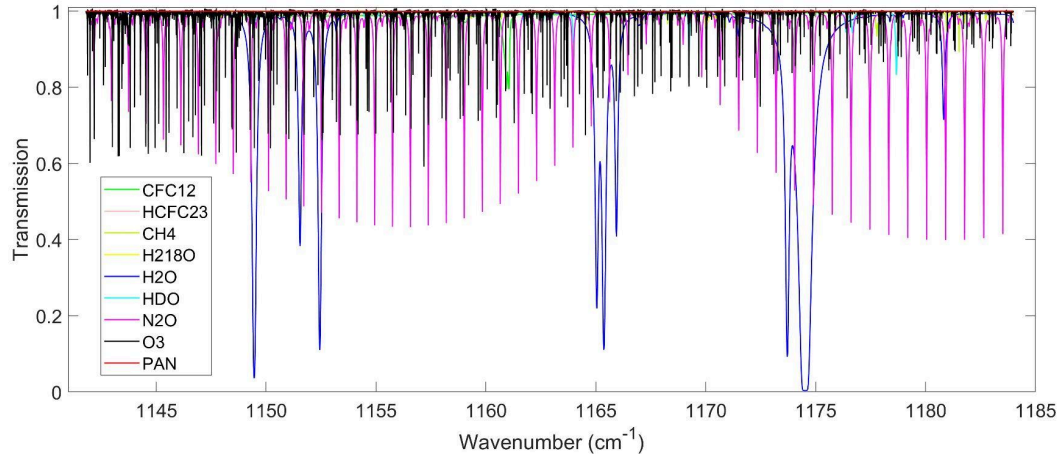

(b)

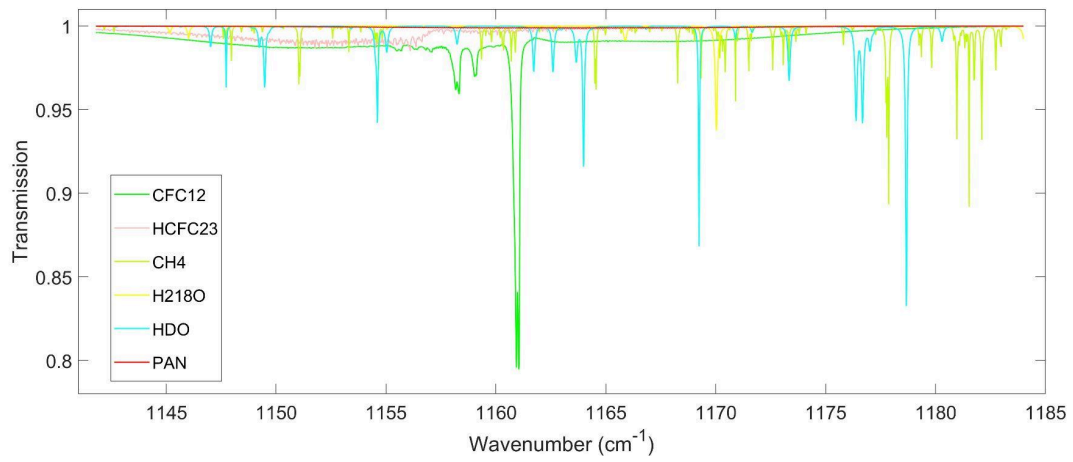

(c)

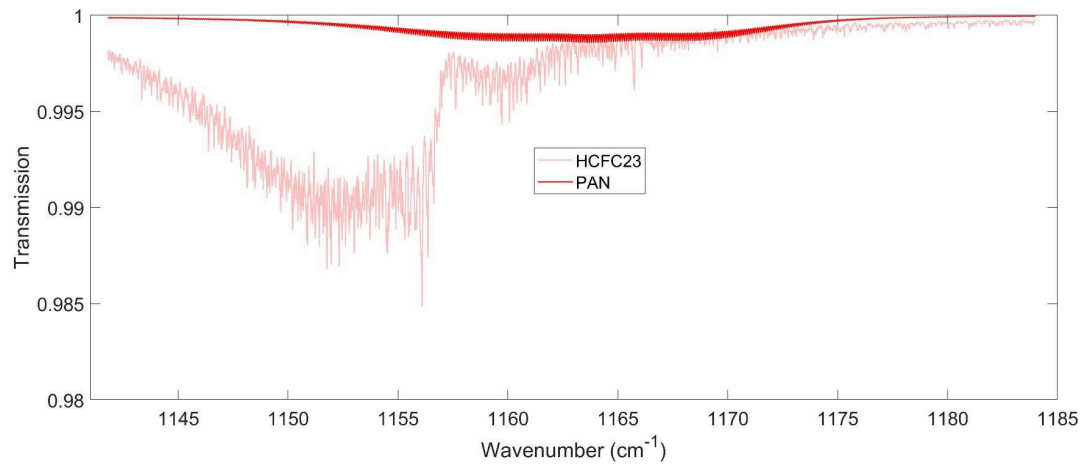

(d)

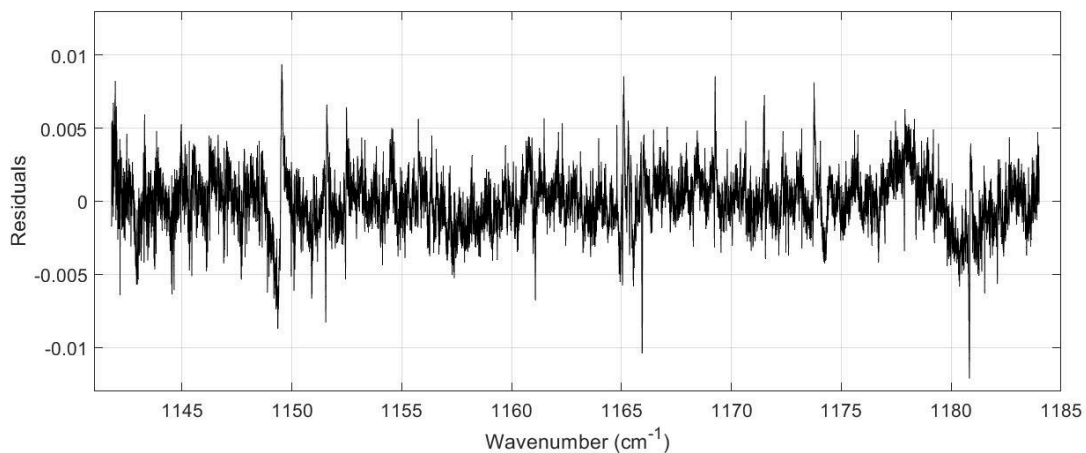

**Figure S1.** a, b, c) Retrieved spectral signatures for a retrieved PAN column of  $5.64 \times 10^{14}$  molec  $\text{cm}^{-2}$ . Panel (b) and (c) are zoomed-out versions of panel (a) for different subsets of compounds, to show the relative strength of absorbing gases. (d) Spectral residuals (calculated – observed) for the same spectrum.

**Table S2:** Seasonal averages of observed meteorological parameters at Maïdo and statistical evaluation (correlation coefficient (R), root mean square error (RMSE) and mean bias) of modelled meteorology against these observations.

|                                    | January |      |      |           | July    |      |      |           |
|------------------------------------|---------|------|------|-----------|---------|------|------|-----------|
|                                    | Average | R    | RMSE | Mean bias | Average | R    | RMSE | Mean bias |
| Temperature (K)                    | 288.5   | 0.76 | 1.34 | -0.25     | 283.1   | 0.77 | 2.31 | -1.18     |
| Relative humidity, %               | 74.3    | 0.67 | 14.6 | 1.7       | 59.4    | 0.53 | 23.3 | 5.1       |
| Solar radiation, W $\text{m}^{-2}$ | 267.3   | 0.82 | 211  | 4         | 222.5   | 0.94 | 99   | -10       |
| Wind direction, °                  | 117.9   | 0.79 | 62.5 | -9.5      | 146.9   | 0.71 | 61.6 | -1.23     |
| Wind speed, $\text{m s}^{-1}$      | 3.2     | 0.57 | 1.83 | 0.89      | 2.78    | 0.31 | 1.90 | 0.11      |

**Table S3.** Average concentrations of species ( $\mu\text{g m}^{-3}$ ) measured at the air quality stations.

| #  |                      | Daytime (8:00 - 16:00 LT) |                 |                | Nighttime (20:00 - 03:00 LT) |                 |                |
|----|----------------------|---------------------------|-----------------|----------------|------------------------------|-----------------|----------------|
|    |                      | NO <sub>2</sub>           | NO <sub>x</sub> | O <sub>3</sub> | NO <sub>2</sub>              | NO <sub>x</sub> | O <sub>3</sub> |
| 1  | Terrain de Sel       | 7.79                      | 20.32           | /              | 4.83                         | 7.29            | /              |
| 2  | Centre Pénitentiaire | 9.17                      | 29.79           | /              | 9.03                         | 17.62           | /              |
| 3  | Lislet Geoffroy      | 4.67                      | 8.59            | /              | 5.98                         | 7.43            | /              |
| 4  | Sarda Garriga        | 6.01                      | 18.97           | /              | 7.76                         | 8.73            | /              |
| 5  | Joinville            | 4.04                      | 8.14            | 27.15          | 5.77                         | 7.74            | 18.77          |
| 6  | La Marine            | 2.59                      | 5.84            | 24.25          | 4.77                         | 6.06            | 12.98          |
| 7  | Plateau Caillou      | 4.84                      | 10.14           | 30.93          | 5.84                         | 7.33            | 20.01          |
| 8  | Grand Fond           | 3.19                      | 6.93            | 23.75          | 7.87                         | 10.68           | 13.84          |
| 9  | Paradis              | 5.07                      | 11.89           | 27.48          | 8.82                         | 12.95           | 12.70          |
| 10 | Route des Tamarins   | 8.49                      | 44.11           | /              | 11.02                        | 50.20           | /              |
| 11 | Boulevard Banks      | 17.11                     | 55.90           | /              | 13.93                        | 31.08           | /              |
| 12 | Luther King          | 8.69                      | 33.39           | 28.43          | 10.04                        | 23.03           | 11.18          |

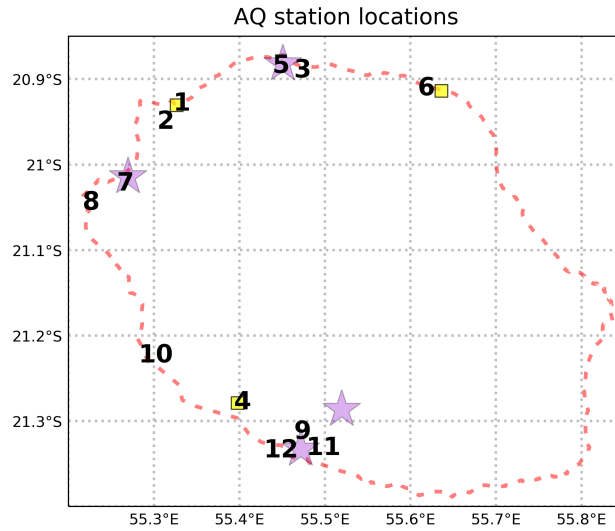

**Figure S2.** Geographical locations of 12 stations in Table S3. The purple stars and yellow squares represent the most populated cities and power plant locations, respectively, similar to Fig. 2 in the main paper.

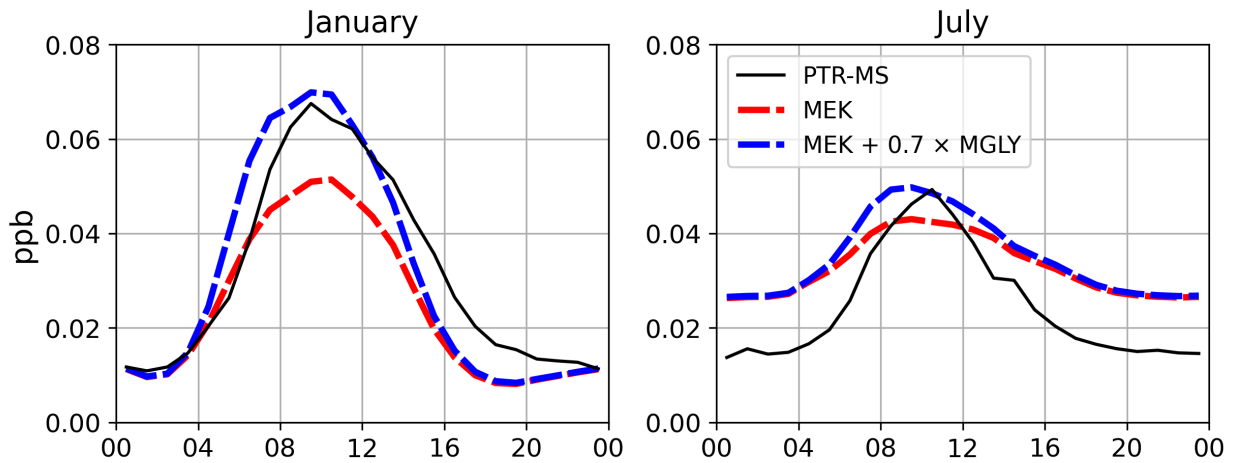

**Figure S3.** Average diurnal cycle of measured and modelled MEK, omitting (red) and including the MGLY interference (blue).

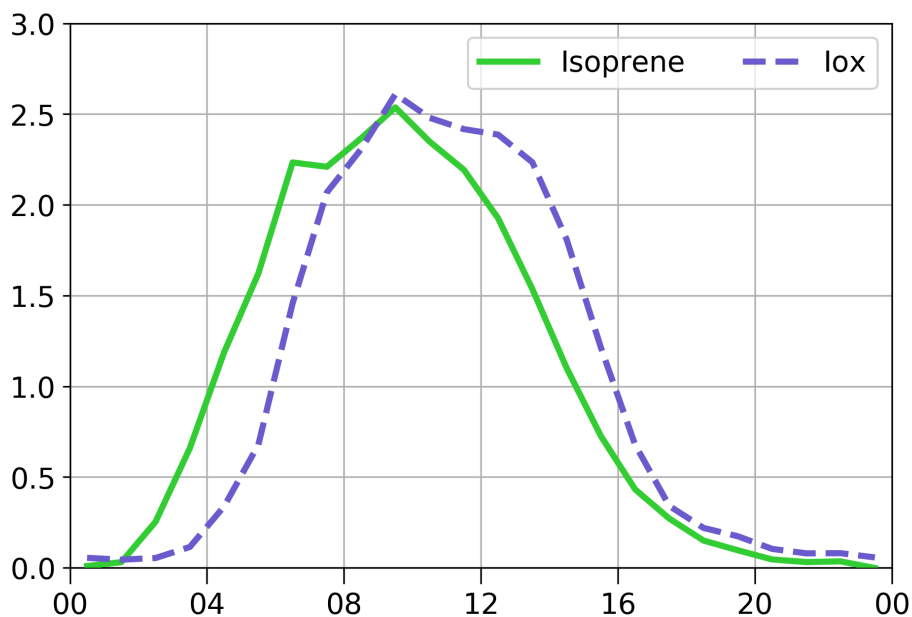

**Figure S4.** Average diurnal cycle of observed isoprene (green) and lox mixing ratios (purple), normalized by their respective means, for the month of January.

**Table S4:** Statistics of model performance (correlation coefficient ( $R$ ), root mean square error (RMSE) and mean bias) against PTR-MS observations. The runs listed are labeled using the shorthand in Table 4. Note that for isoprene, only daytime hours were considered in the statistical evaluation (6AM - 6PM).

|                           | $R$     |       |       |       |       |       |       |       |       |       |
|---------------------------|---------|-------|-------|-------|-------|-------|-------|-------|-------|-------|
|                           | January |       |       |       |       | July  |       |       |       |       |
|                           | R0      | S2    | S3    | S4    | S5    | R0    | S2    | S3    | S4    | S5    |
| Formaldehyde              | 0.650   | 0.637 | 0.634 | 0.623 | 0.661 | 0.761 | 0.762 | 0.757 | 0.754 | 0.790 |
| Methanol                  | 0.706   | 0.700 | 0.722 | 0.704 | 0.706 | 0.674 | 0.671 | 0.673 | 0.674 | 0.675 |
| Acetaldehyde              | 0.569   | 0.560 | 0.562 | 0.558 | 0.705 | 0.457 | 0.427 | 0.453 | 0.450 | 0.663 |
| Acetone                   | 0.361   | 0.364 | 0.392 | 0.359 | 0.022 | 0.585 | 0.426 | 0.594 | 0.586 | 0.325 |
| Isoprene                  | 0.627   | 0.653 | 0.631 | 0.632 | 0.647 | 0.672 | 0.673 | 0.690 | 0.668 | 0.668 |
| MVK/MACR/ISOOH            | 0.663   | 0.659 | 0.559 | 0.662 | 0.658 | 0.622 | 0.63  | 0.245 | 0.563 | 0.627 |
| MEK/MGLY<br>(m/z 73)      | 0.793   | 0.792 | 0.698 | 0.777 | 0.741 | 0.629 | 0.463 | 0.542 | 0.614 | 0.463 |
| Monoterpenes<br>(m/z 137) | 0.322   | 0.344 | 0.059 | 0.338 | 0.339 | 0.416 | 0.412 | 0.142 | 0.412 | 0.408 |
| Monoterpenes<br>(m/z 81)  | 0.391   | 0.403 | 0.113 | 0.4   | 0.397 | 0.417 | 0.422 | 0.244 | 0.415 | 0.419 |
| Acetic acid               | 0.787   | 0.782 | 0.77  | 0.772 | 0.786 | 0.644 | 0.635 | 0.646 | 0.643 | 0.649 |

|                           | RMSE (ppb)      |        |        |        |        |        |        |        |        |        |
|---------------------------|-----------------|--------|--------|--------|--------|--------|--------|--------|--------|--------|
|                           | January         |        |        |        |        | July   |        |        |        |        |
|                           | R0              | S2     | S3     | S4     | S5     | R0     | S2     | S3     | S4     | S5     |
| Formaldehyde              | 0.551           | 0.557  | 0.553  | 0.581  | 0.581  | 0.258  | 0.254  | 0.266  | 0.26   | 0.267  |
| Methanol                  | 0.361           | 0.439  | 0.768  | 0.362  | 0.361  | 0.378  | 0.488  | 0.768  | 0.381  | 0.383  |
| Acetaldehyde              | 0.111           | 0.109  | 0.112  | 0.112  | 0.154  | 0.092  | 0.096  | 0.092  | 0.092  | 0.121  |
| Acetone                   | 0.119           | 0.12   | 0.116  | 0.119  | 0.194  | 0.084  | 0.421  | 0.086  | 0.084  | 0.098  |
| Isoprene                  | 0.149           | 0.144  | 0.148  | 0.148  | 0.145  | 0.043  | 0.043  | 0.042  | 0.043  | 0.043  |
| MVK/MACR/<br>ISOOH        | 0.115           | 0.116  | 0.138  | 0.118  | 0.116  | 0.039  | 0.039  | 0.136  | 0.035  | 0.039  |
| MEK/MGLY<br>(m/z 73)      | 0.018           | 0.021  | 0.022  | 0.019  | 0.026  | 0.017  | 0.040  | 0.017  | 0.018  | 0.015  |
| Monoterpenes<br>(m/z 137) | 0.021           | 0.021  | 0.124  | 0.021  | 0.021  | 0.016  | 0.016  | 0.085  | 0.016  | 0.016  |
| Monoterpenes<br>(m/z 81)  | 0.011           | 0.011  | 0.108  | 0.011  | 0.011  | 0.014  | 0.014  | 0.069  | 0.014  | 0.014  |
| Acetic acid               | 0.226           | 0.227  | 0.217  | 0.234  | 0.237  | 0.174  | 0.17   | 0.167  | 0.175  | 0.181  |
|                           | Mean bias (ppb) |        |        |        |        |        |        |        |        |        |
|                           | January         |        |        |        |        | July   |        |        |        |        |
|                           | R0              | S2     | S3     | S4     | S5     | R0     | S2     | S3     | S4     | S5     |
| Formaldehyde              | -0.394          | -0.396 | -0.376 | -0.441 | -0.45  | -0.12  | -0.112 | -0.102 | -0.136 | -0.186 |
| Methanol                  | 0.177           | 0.304  | 0.575  | 0.176  | 0.172  | 0.199  | 0.368  | 0.557  | 0.201  | 0.202  |
| Acetaldehyde              | -0.073          | -0.069 | -0.073 | -0.073 | -0.128 | -0.014 | -0.008 | -0.013 | -0.013 | -0.099 |
| Acetone                   | -0.051          | -0.053 | -0.047 | -0.051 | -0.148 | 0.035  | 0.398  | 0.04   | 0.035  | -0.032 |
| Isoprene                  | -0.051          | -0.046 | -0.046 | -0.042 | -0.048 | -0.008 | -0.007 | -0.007 | -0.008 | -0.008 |
| MVK/MACR/<br>ISOOH        | -0.010          | -0.011 | 0.042  | -0.024 | -0.012 | 0.021  | 0.021  | 0.093  | 0.015  | 0.021  |
| MEK/MGLY<br>(m/z 73)      | -0.001          | 0.003  | -0.011 | -0.001 | -0.019 | 0.010  | 0.035  | 0.008  | 0.010  | -0.004 |
| Monoterpenes<br>(m/z 137) | 0.017           | 0.017  | 0.109  | 0.017  | 0.016  | 0.008  | 0.008  | 0.072  | 0.008  | 0.008  |
| Monoterpenes<br>(m/z 81)  | -0.002          | -0.002 | 0.091  | -0.001 | -0.002 | -0.011 | -0.011 | 0.053  | -0.011 | -0.011 |
| Acetic acid               | -0.177          | -0.177 | -0.168 | -0.182 | -0.187 | -0.126 | -0.12  | -0.12  | -0.127 | -0.134 |

**Table S5.** Sources of acetaldehyde over Réunion Island (tons/month), including anthropogenic and biogenic emissions (R0), and secondary photochemical formation from precursor species in January and July.

| Source                                            | January | July |
|---------------------------------------------------|---------|------|
| Anthropogenic emission                            | 144     | 144  |
| Biogenic emission                                 | 21      | 7    |
| C <sub>2</sub> H <sub>6</sub> + OH                | 27.2    | 10.7 |
| C <sub>3</sub> H <sub>8</sub> + OH                | 1.2     | 0.6  |
| C <sub>3</sub> H <sub>6</sub> + OH/O <sub>3</sub> | 20.3    | 8.5  |
| BIGENE + OH                                       | 17.9    | 7.8  |
| BIGALK + OH                                       | 6.1     | 2.3  |
| MVK + O <sub>3</sub>                              | 0.04    | 0.03 |
| MEK + OH                                          | 5.5     | 2.3  |
| C <sub>2</sub> H <sub>5</sub> OH + OH             | 23.0    | 13.3 |

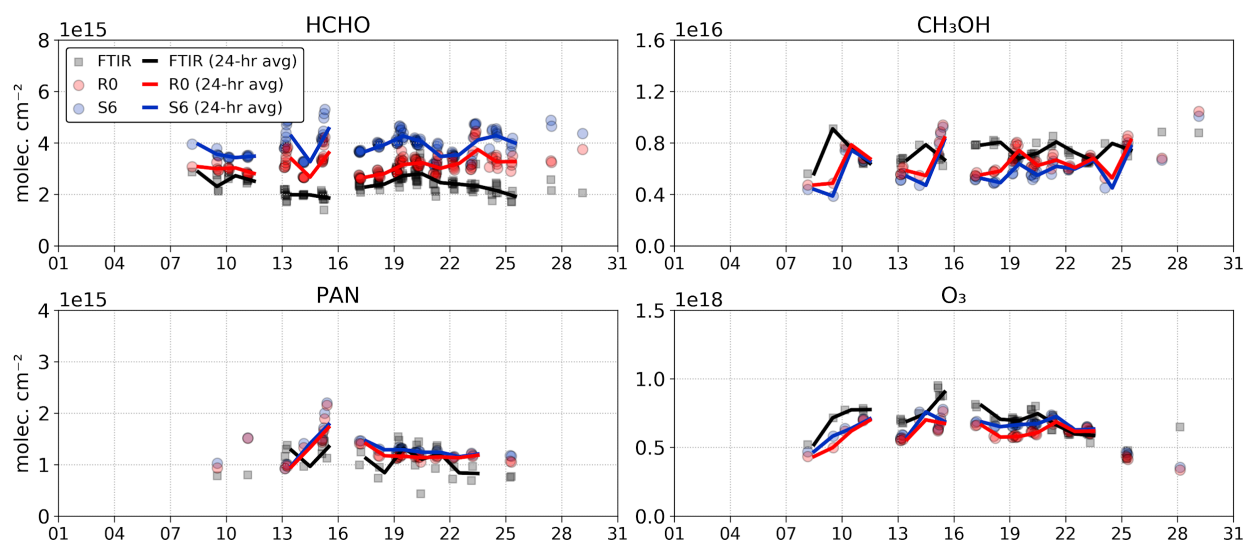

**Figure S5.** Time series of FTIR-measured and modelled HCHO, CH<sub>3</sub>OH, PAN and O<sub>3</sub> tropospheric columns in January 2019. S6 includes NO<sub>x</sub> emissions from lightning, which has a moderate influence on these four species, while the others shown in Fig. 15 are essentially unchanged (CO and C<sub>2</sub>H<sub>6</sub>).



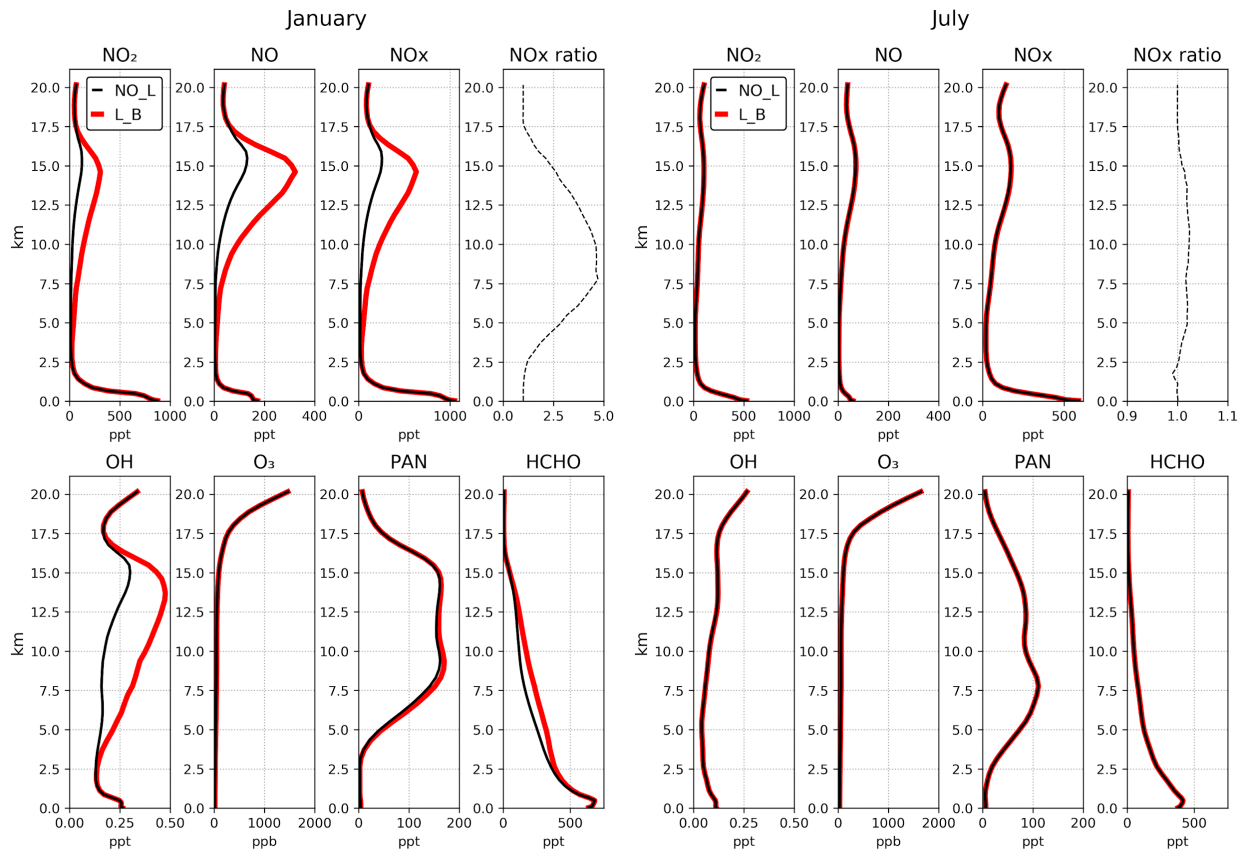

**Figure S6.** Monthly-averaged vertical profiles for  $\text{NO}_2$ ,  $\text{NO}$ ,  $\text{NO}_x$ ,  $\text{OH}$ ,  $\text{O}_3$  and PAN from WRF-Chem simulations using the R0 settings, with lightning turned off (black line,  $\text{NO}_L$ ) and lightning turned on with the Barten et al. (2020) settings (red line,  $L_B$ ). The  $\text{NO}_x$  ratio is obtained by dividing  $L_B$   $\text{NO}_x$  by  $\text{NO}_L$   $\text{NO}_x$ .

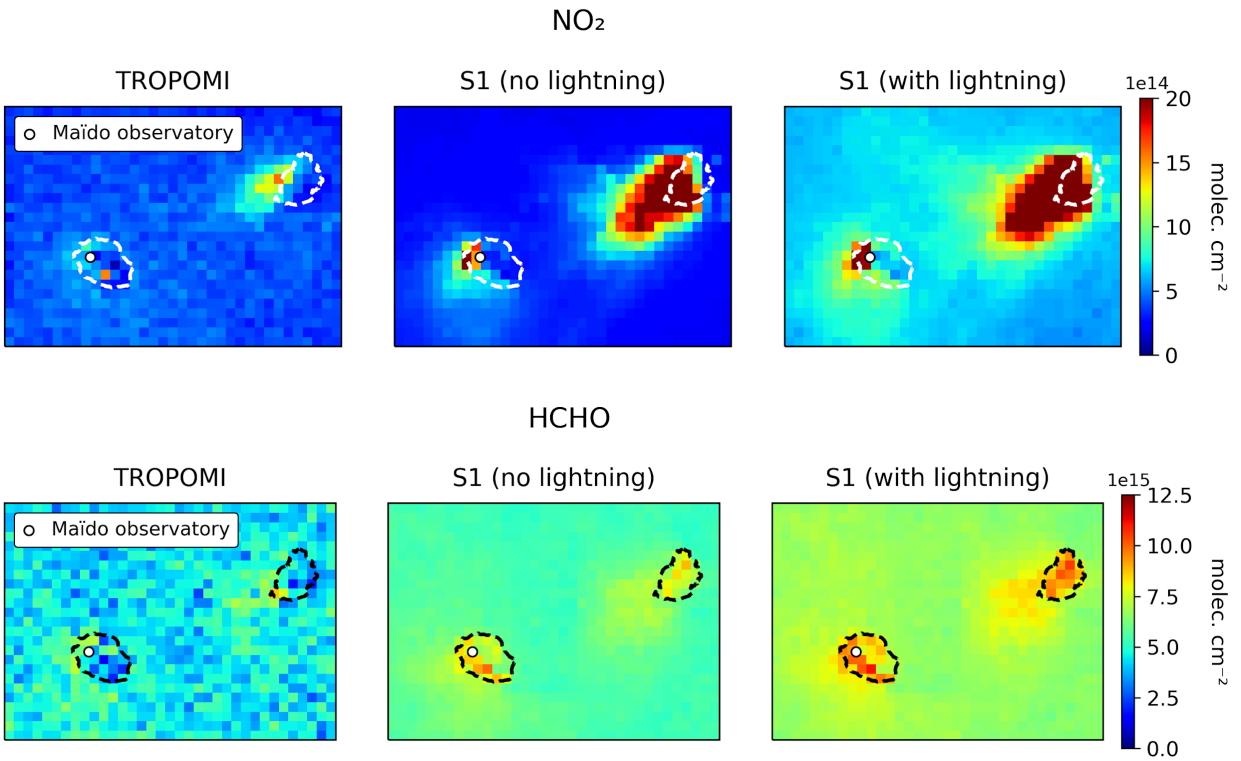

**Figure S7.** Monthly-averaged NO<sub>2</sub> and HCHO columns from TROPOMI and WRF-Chem simulation S1 for January, regridded to 0.1° resolution. S1 simulation was conducted without lightning (middle panel) and with lightning (right panel).

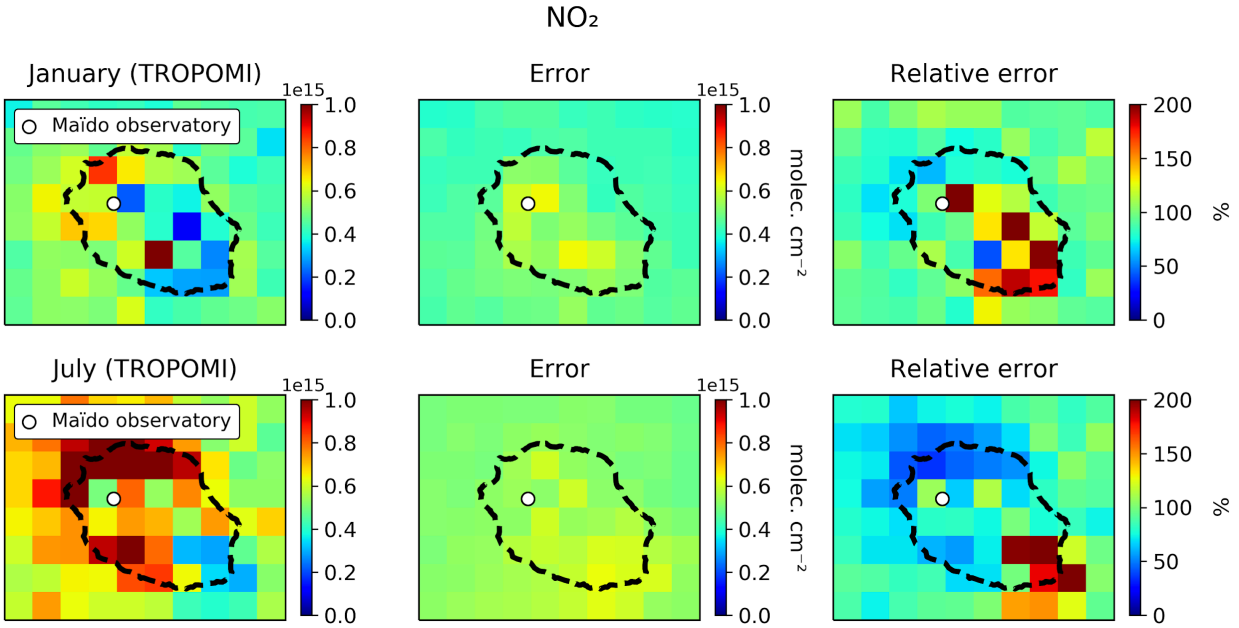

**Figure S8.** Monthly-averaged TROPOMI NO<sub>2</sub> column (left) and uncertainty (middle) in January and July, regridded to 0.1° resolution, in molec. cm<sup>-2</sup>. The relative error is also shown (% , right panel). The NO<sub>2</sub> error excludes the component due to the vertical profile assumption in the retrieval, given that averaging kernels are used in the model comparisons with TROPOMI data.

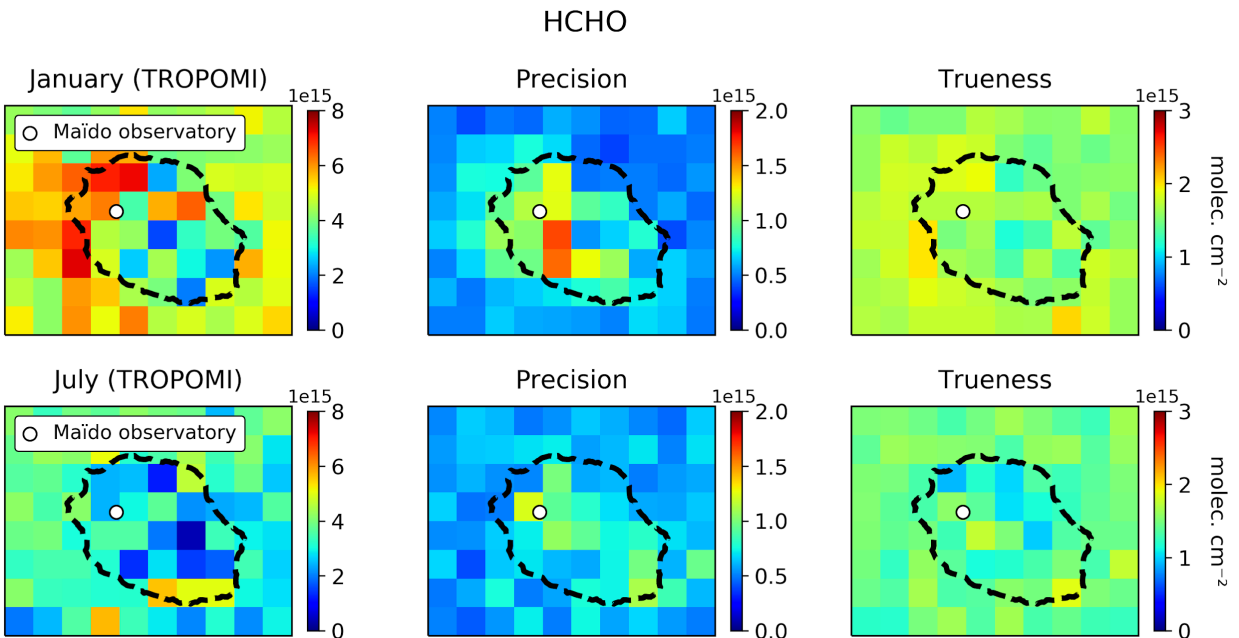

**Figure S9.** Monthly-averaged TROPOMI HCHO columns at 0.1° resolution (left), precision (mean pixel-level precision from TROPOMI divided by the square root of the number of data) and trueness, for January and July (molec. cm<sup>-2</sup>). The HCHO trueness excludes the component due to the vertical profile assumed in the retrieval, given that averaging kernels are used in the model comparisons with TROPOMI.
